# Supplementary material for: Efficacy and safety of first-line avelumab in patients with advanced non-small cell lung cancer: results from a phase Ib cohort of the JAVELIN Solid Tumor study
Source: PubMed Central journal article supplement (PMC7481079; doi:10.1136/jitc-2020-001064), 2020-09-08
Supplement: jitc-2020-001064supp001.pdf [file jitc-2020-001064supp001.pdf]

**Additional file 1.** Percentage change from baseline in target lesions over time in evaluable patients (n = 142).

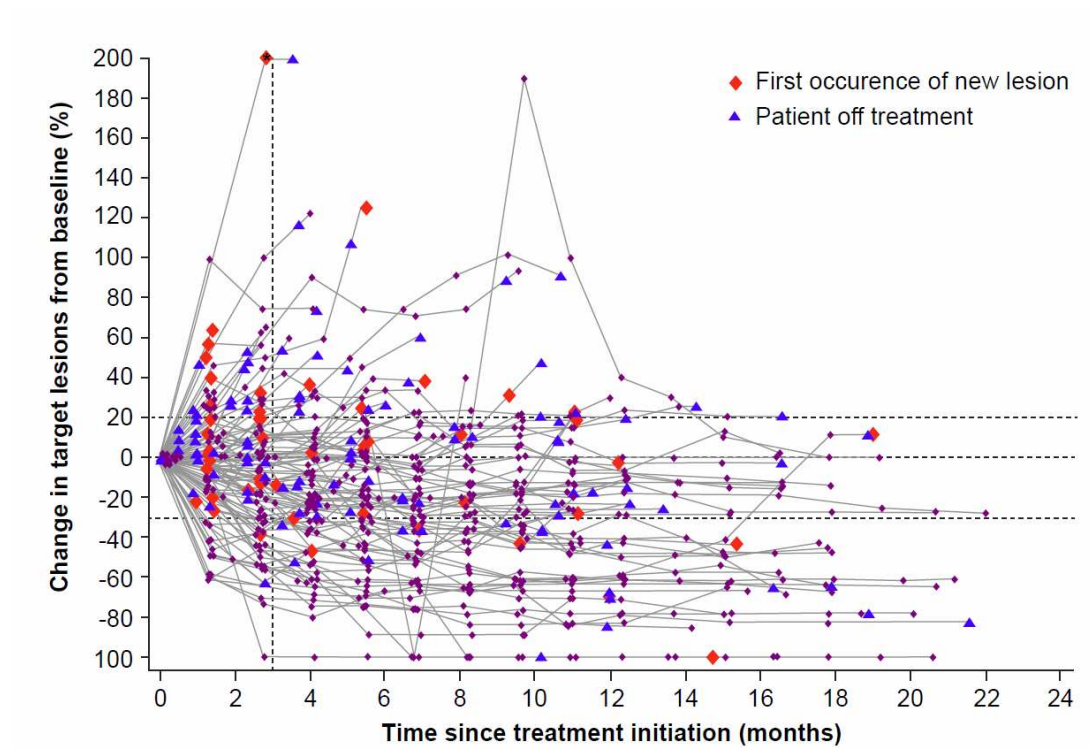

\*Data point imputed with a cap of 200%.
