# Supplementary material for: Efficacy and safety of first-line avelumab in patients with advanced non-small cell lung cancer: results from a phase Ib cohort of the JAVELIN Solid Tumor study
Source: PubMed Central journal article supplement (PMC7481079; doi:10.1136/jitc-2020-001064), 2020-09-08

**Additional file 2.** Best change from baseline in target lesions in evaluable patients (patients with a baseline and at least 1 post-baseline lesion assessment; n = 142) by (A) PD-L1 expression, (B) tumor histology, and (C) smoking status.

**A.**

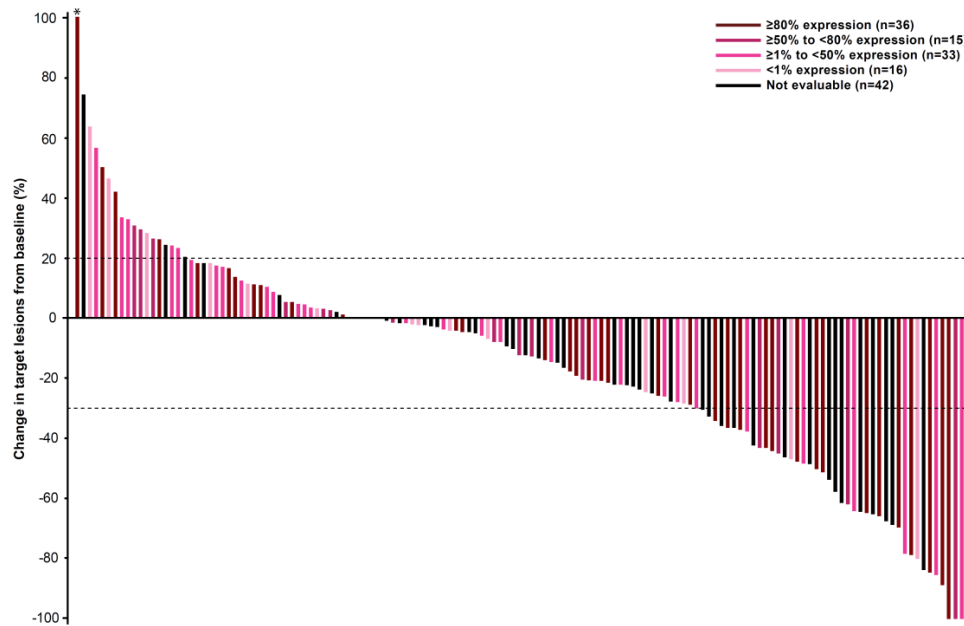

**B.**

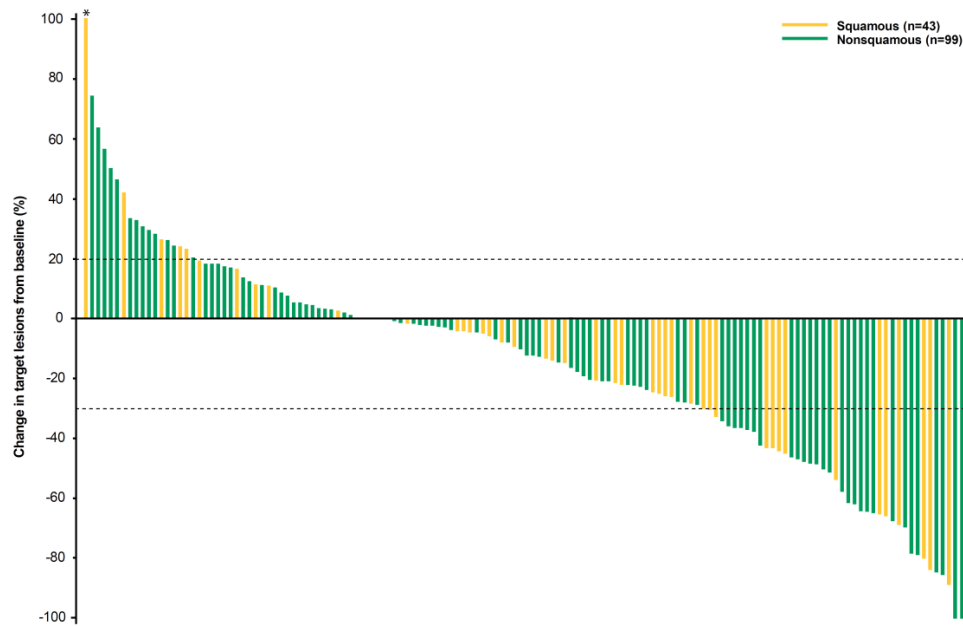

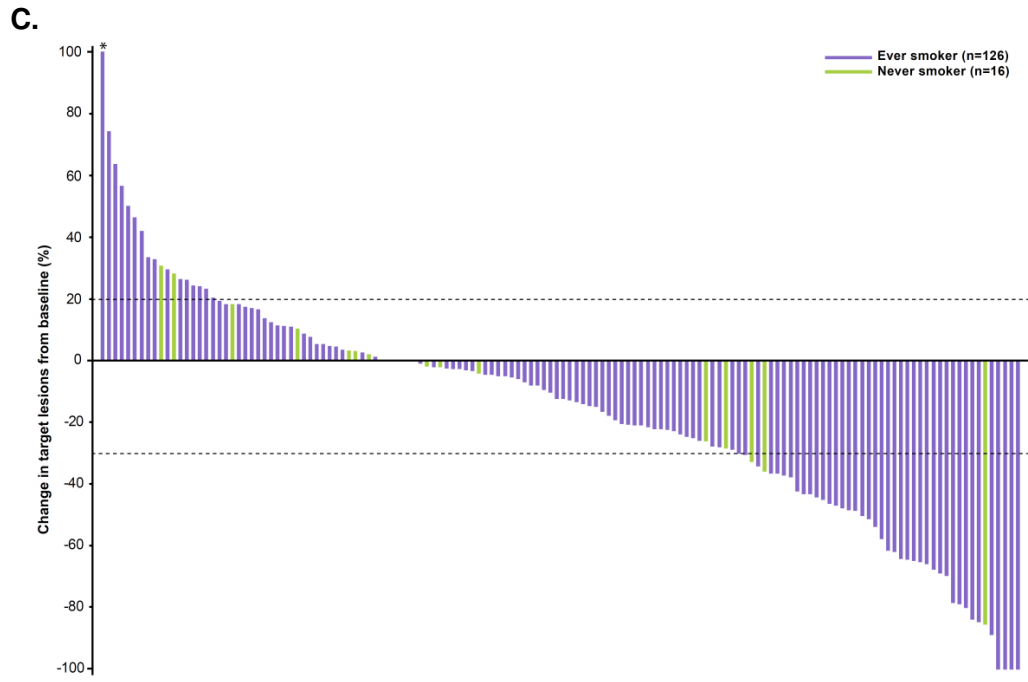

Supplement: jitc-2020-001064supp002.pdf [file jitc-2020-001064supp002.pdf]
